# Supplementary material
Source: ML conference proceedings conference paper supplement (https://proceedings.mlr.press/v37/tewari15.html)
Supplement: Supplementary file 1 [file tewari15-supp.pdf]

## A. Proof of Proposition 1

*Proof.* Let  $e_j$ 's denote standard basis vectors. We have

$$\nabla_s \phi_{\text{LN}}(s, y) = - \sum_{j=1}^m P_j(y) e_j + \sum_{j=1}^m \frac{\exp(s_j)}{\sum_{j'=1}^m \exp(s_{j'})} e_j$$

Therefore,

$$\begin{aligned} \|\nabla_s \phi_{\text{LN}}(s, y)\|_1 &\leq \sum_{j=1}^m P_j(y) \|e_j\|_1 + \sum_{j=1}^m \frac{\exp(s_j)}{\sum_{j'=1}^m \exp(s_{j'})} \|e_j\|_1 \\ &= 2. \end{aligned}$$

We also have

$$[\nabla_s^2 \phi_{\text{LN}}(s, y)]_{j,k} = \begin{cases} -\frac{\exp(2s_j)}{(\sum_{j'=1}^m \exp(s_{j'}))^2} + \frac{\exp(s_j)}{\sum_{j'=1}^m \exp(s_{j'})} & \text{if } j = k \\ -\frac{\exp(s_j + s_k)}{(\sum_{j'=1}^m \exp(s_{j'}))^2} & \text{if } j \neq k. \end{cases}$$

Moreover,

$$\begin{aligned} \|\nabla_s^2 \phi_{\text{LN}}(s, y)\|_{\infty \rightarrow 1} &\leq \sum_{j=1}^m \sum_{k=1}^m |[\nabla_s^2 \phi_{\text{LN}}(s, y)]_{j,k}| \\ &\leq \sum_{j=1}^m \sum_{k=1}^m \frac{\exp(s_j + s_k)}{(\sum_{j'=1}^m \exp(s_{j'}))^2} + \sum_{j=1}^m \frac{\exp(s_j)}{\sum_{j'=1}^m \exp(s_{j'})} \\ &= \frac{(\sum_{j=1}^m \exp(s_j))^2}{(\sum_{j'=1}^m \exp(s_{j'}))^2} + \frac{\sum_{j=1}^m \exp(s_j)}{\sum_{j'=1}^m \exp(s_{j'})} \\ &= 2 \end{aligned}$$

□

## B. Proof of Proposition 2

*Proof.* Let  $1_{(\text{condition})}$  denote an indicator variable. We have

$$[\nabla_s \phi_{\text{SD}}(s, y)]_j = D(1) \left( \sum_{i=1}^m G(r_i) \left[ \frac{1}{\sigma} \frac{\exp(s_i/\sigma)}{\sum_{j'} \exp(s_{j'}/\sigma)} 1_{(i=j)} - \frac{1}{\sigma} \frac{\exp((s_i + s_j)/\sigma)}{(\sum_{j'} \exp(s_{j'}/\sigma))^2} \right] \right)$$

Therefore,

$$\begin{aligned} \frac{\|\nabla_s \phi_{\text{SD}}(s, y)\|_1}{D(1)G(Y_{\max})} &\leq \sum_{j=1}^m \left( \sum_{i=1}^m \left[ \frac{1}{\sigma} \frac{\exp(s_i/\sigma)}{\sum_{j'} \exp(s_{j'}/\sigma)} 1_{(i=j)} + \frac{1}{\sigma} \frac{\exp((s_i + s_j)/\sigma)}{(\sum_{j'} \exp(s_{j'}/\sigma))^2} \right] \right) \\ &= \frac{1}{\sigma} \left( \frac{\sum_j \exp(s_j/\sigma)}{\sum_{j'} \exp(s_{j'}/\sigma)} + \frac{(\sum_j \exp(s_j/\sigma))^2}{(\sum_{j'} \exp(s_{j'}/\sigma))^2} \right) \\ &= \frac{2}{\sigma}. \end{aligned}$$

□

## C. RankSVM

The RankSVM surrogate is defined as:

$$\phi_{RS}(s, y) = \sum_{i=1}^m \sum_{j=1}^m \max(0, 1_{(y_i > y_j)} (1 + s_j - s_i))$$

It is easy to see that  $\nabla_s \phi_{RS}(s, y) = \sum_{i=1}^m \sum_{j=1}^m \max(0, 1_{(y_i > y_j)}(1 + s_j - s_i))(e_j - e_i)$ . Thus, the  $\ell_1$  norm of gradient is  $O(m^2)$ .

### D. Proof of Theorem 3

*Proof.* It is straightforward to check that  $\mathcal{F}'_{\text{lin}}$  is contained in both  $\mathcal{F}_{\text{full}}$  as well as  $\mathcal{F}_{\text{perminv}}$ . So, we just need to prove that any  $f$  that is in both  $\mathcal{F}_{\text{full}}$  and  $\mathcal{F}_{\text{perminv}}$  has to be in  $\mathcal{F}'_{\text{lin}}$  as well.

Let  $P_\pi$  denote the  $m \times m$  permutation matrix corresponding to a permutation  $\pi$ . Consider the full linear class  $\mathcal{F}_{\text{full}}$ . In matrix notation, the permutation invariance property means that, for any  $\pi, X$ , we have  $P_\pi[\langle X, W_1 \rangle, \dots, \langle X, W_m \rangle]^\top = [\langle P_\pi X, W_1 \rangle, \dots, \langle P_\pi X, W_m \rangle]^\top$ .

Let  $\rho_1 = \{P_\pi : \pi(1) = 1\}$ , where  $\pi(i)$  denotes the index of the element in the  $i$ th position according to permutation  $\pi$ . Fix any  $P \in \rho_1$ . Then, for any  $X$ ,  $\langle X, W_1 \rangle = \langle PX, W_1 \rangle$ . This implies that, for all  $X$ ,  $\text{Tr}(W_1^\top X) = \text{Tr}(W_1^\top PX)$ . Using the fact that  $\text{Tr}(A^\top X) = \text{Tr}(B^\top X), \forall X$  implies  $A = B$ , we have that  $W_1^\top = W_1^\top P$ . Because  $P^\top = P^{-1}$ , this means  $PW_1 = W_1$ . This shows that all rows of  $W_1$ , other than 1st row, are the same but perhaps different from 1st row. By considering  $\rho_i = \{P_\pi : \pi(i) = i\}$  for  $i > 1$ , the same reasoning shows that, for each  $i$ , all rows of  $W_i$ , other than  $i$ th row, are the same but possibly different from  $i$ th row.

Let  $\rho_{1 \leftrightarrow 2} = \{P_\pi : \pi(1) = 2, \pi(2) = 1\}$ . Fix any  $P \in \rho_{1 \leftrightarrow 2}$ . Then, for any  $X$ ,  $\langle X, W_2 \rangle = \langle PX, W_1 \rangle$  and  $\langle X, W_1 \rangle = \langle PX, W_2 \rangle$ . Thus, we have  $W_2^\top = W_1^\top P$  as well as  $W_1^\top = W_2^\top P$  which means  $PW_2 = W_1, PW_1 = W_2$ . This shows that row 1 of  $W_1$  and row 2 of  $W_2$  are the same. Moreover, row 2 of  $W_1$  and row 1 of  $W_2$  are the same. Thus, for some  $u, u' \in \mathbb{R}^d$ ,  $W_1$  is of the form  $[u|u'|u' \dots |u']^\top$  and  $W_2$  is of the form  $[u'|u|u' \dots |u']^\top$ . Repeating this argument by considering  $\rho_{1 \leftrightarrow i}$  for  $i > 2$  shows that  $W_i$  is of the same form ( $u$  in row  $i$  and  $u'$  elsewhere).

Therefore, we have proved that any linear map that is permutation invariant has to be of the form:

$$X \mapsto \left( u^\top X_i + (u')^\top \sum_{j \neq i} X_j \right)_{i=1}^m.$$

We can reparameterize above using  $w = u - u'$  and  $v = u'$  which proves the result.  $\square$

### E. Proof of Lemma 4

*Proof.* The first equality is true because

$$\begin{aligned} \|X^\top\|_{1 \rightarrow p} &= \sup_{v \neq 0} \frac{\|X^\top v\|_p}{\|v\|_1} = \sup_{v \neq 0} \sup_{u \neq 0} \frac{\langle X^\top v, u \rangle}{\|v\|_1 \|u\|_q} \\ &= \sup_{u \neq 0} \sup_{v \neq 0} \frac{\langle v, Xu \rangle}{\|v\|_1 \|u\|_q} = \sup_{u \neq 0} \frac{\|Xu\|_\infty}{\|u\|_q} = \|X\|_{q \rightarrow \infty}. \end{aligned}$$

The second is true because

$$\begin{aligned} \|X\|_{q \rightarrow \infty} &= \sup_{u \neq 0} \frac{\|Xu\|_\infty}{\|u\|_q} = \sup_{u \neq 0} \max_{j=1}^m \frac{|\langle X_j, u \rangle|}{\|u\|_q} \\ &= \max_{j=1}^m \sup_{u \neq 0} \frac{|\langle X_j, u \rangle|}{\|u\|_q} = \max_{j=1}^m \|X_j\|_p. \end{aligned}$$

$\square$

### F. Proof of Theorem 6

Our theorem is developed from the ‘‘expectation version’’ of Theorem 6 of [Shalev-Shwartz et al. \(2009\)](#) that was originally given in probabilistic form. The expected version is as follows.

Let  $\mathcal{Z}$  be a space endowed with a probability distribution generating iid draws  $Z_1, \dots, Z_n$ . Let  $\mathcal{W} \subseteq \mathbb{R}^d$  and  $f : \mathcal{W} \times \mathcal{Z} \rightarrow$

$\mathbb{R}$  be  $\lambda$ -strongly convex<sup>4</sup> and  $G$ -Lipschitz (w.r.t.  $\|\cdot\|_2$ ) in  $w$  for every  $z$ . We define  $F(w) = \mathbb{E}[f(w, Z)]$  and let

$$\begin{aligned} w^* &= \operatorname{argmin}_{w \in \mathcal{W}} F(w), \\ \hat{w} &= \operatorname{argmin}_{w \in \mathcal{W}} \frac{1}{n} \sum_{i=1}^n f(w, Z_i). \end{aligned}$$

Then  $\mathbb{E}[F(\hat{w}) - F(w^*)] \leq \frac{4G^2}{\lambda n}$ , where the expectation is taken over the sample. The above inequality can be proved by carefully going through the proof of Theorem 6 proved by Shalev-Shwartz et al. (2009).

We now derive the ‘‘expectation version’’ of Theorem 7 of Shalev-Shwartz et al. (2009). Define the regularized empirical risk minimizer as follows:

$$\hat{w}_\lambda = \operatorname{argmin}_{w \in \mathcal{W}} \frac{\lambda}{2} \|w\|_2^2 + \frac{1}{n} \sum_{i=1}^n f(w, Z_i). \quad (9)$$

The following result gives optimality guarantees for the regularized empirical risk minimizer.

**Theorem 18.** *Let  $\mathcal{W} = \{w : \|w\|_2 \leq W_2\}$  and let  $f(w, z)$  be convex and  $G$ -Lipschitz (w.r.t.  $\|\cdot\|_2$ ) in  $w$  for every  $z$ . Let  $Z_1, \dots, Z_n$  be iid samples and let  $\lambda = \sqrt{\frac{4G^2}{\frac{W_2^2}{2} + \frac{4W_2^2}{n}}}$ . Then for  $\hat{w}_\lambda$  and  $w^*$  as defined above, we have*

$$\mathbb{E}[F(\hat{w}_\lambda) - F(w^*)] \leq 2GW_2 \left( \frac{8}{n} + \sqrt{\frac{2}{n}} \right). \quad (10)$$

*Proof.* Let  $r_\lambda(w, z) = \frac{\lambda}{2} \|w\|_2^2 + f(w, z)$ . Then  $r_\lambda$  is  $\lambda$ -strongly convex with Lipschitz constant  $\lambda W_2 + G$  in  $\|\cdot\|_2$ . Applying ‘‘expectation version’’ of Theorem 6 of Shalev-Shwartz et al. (2009) to  $r_\lambda$ , we get

$$\mathbb{E} \left[ \frac{\lambda}{2} \|\hat{w}_\lambda\|_2^2 + F(\hat{w}_\lambda) \right] \leq \min_{w \in \mathcal{W}} \left\{ \frac{\lambda}{2} \|w\|_2^2 + F(w) \right\} + \frac{4(\lambda W_2 + G)^2}{\lambda n} \leq \frac{\lambda}{2} \|w^*\|_2^2 + F(w^*) + \frac{4(\lambda W_2 + G)^2}{\lambda n}.$$

Thus, we get

$$\mathbb{E}[F(\hat{w}_\lambda) - F(w^*)] \leq \frac{\lambda W_2^2}{2} + \frac{4(\lambda W_2 + G)^2}{\lambda n}.$$

Minimizing the upper bound w.r.t.  $\lambda$ , we get  $\lambda = \sqrt{\frac{4G^2}{n}} \sqrt{\frac{1}{\frac{W_2^2}{2} + \frac{4W_2^2}{n}}}$ . Plugging this choice back in the equation above and using the fact that  $\sqrt{a+b} \leq \sqrt{a} + \sqrt{b}$  finishes the proof of Theorem 18.  $\square$

We now have all ingredients to prove Theorem 6.

*Proof of Theorem 6.* Let  $\mathcal{Z} = \mathcal{X} \times \mathcal{Y}$  and  $f(w, z) = \phi(Xw, y)$  and apply Theorem 18. Finally note that if  $\phi$  is  $G_\phi$ -Lipschitz w.r.t.  $\|\cdot\|_\infty$  and every row of  $X \in \mathbb{R}^{m \times d}$  has Euclidean norm bounded by  $R_X$  then  $f(\cdot, z)$  is  $G_\phi R_X$ -Lipschitz w.r.t.  $\|\cdot\|_2$  in  $w$ .  $\square$

## G. Proof of Theorem 12

*Proof.* Following exactly the same line of reasoning (reducing a sample of size  $n$ , where each prediction is  $\mathbb{R}^m$ -valued, to an sample of size  $mn$ , where each prediction is real valued) as in the beginning of proof of Proposition 7, we have

$$\mathcal{N}_\infty(\epsilon, \phi \circ \mathcal{F}_1, n) \leq \mathcal{N}_\infty(\epsilon/G_\phi, \mathcal{G}_1, mn). \quad (11)$$

Plugging in the following bound due to Zhang (2002, Corollary 5):

$$\begin{aligned} \log_2 \mathcal{N}_\infty(\epsilon/G_\phi, \mathcal{G}_1, mn) &\leq \left\lceil \frac{288 G_\phi^2 W_1^2 \bar{R}_X^2 (2 + \ln d)}{\epsilon^2} \right\rceil \\ &\quad \times \log_2 (2 \lceil 8G_\phi W_1 \bar{R}_X / \epsilon \rceil mn + 1) \end{aligned}$$

into (11) respectively proves the result.  $\square$

<sup>4</sup>Recall that a function is called  $\lambda$ -strongly convex (w.r.t.  $\|\cdot\|_2$ ) iff  $f - \frac{\lambda}{2} \|\cdot\|_2^2$  is convex.

## H. Calculations involved in deriving Equation (8)

Plugging in the value of  $\eta$  from (7) into the expression

$$\frac{L_\phi(w^*)}{(1-4\eta H)} + \frac{W_2^2}{2\eta(1-4\eta H)n}$$

yields (using the shorthand  $L^*$  for  $L_\phi(w^*)$ )

$$L^* + \frac{2HW_2L^*}{\sqrt{4H^2W_2^2 + 2HL^*n}} + \frac{W_2}{n} \left[ \frac{4H^2W_2^2}{\sqrt{4H^2W_2^2 + 2HL^*n}} + \sqrt{4H^2W_2^2 + 2HL^*n} + 4HW_2 \right]$$

Denoting  $HW_2^2/n$  by  $x$ , this simplifies to

$$L^* + \frac{2\sqrt{x}L^* + 4x\sqrt{x}}{\sqrt{4x + 2L^*}} + \sqrt{x}\sqrt{4x + 2L^*} + 4x.$$

Using the arithmetic mean-geometric mean inequality to upper bound the middle two terms gives

$$L^* + 2\sqrt{2xL^* + 4x^2} + 4x.$$

Finally, using  $\sqrt{a+b} \leq \sqrt{a} + \sqrt{b}$ , we get our final upper bound

$$L^* + 2\sqrt{2xL^*} + 8x.$$

## I. Calculation of smoothness constant

$$\begin{aligned} & \| (X^{(i)})^\top \nabla_s^2 \phi(X^{(i)}w, y^{(i)}) X^{(i)} \|_{2 \rightarrow 2} = \sup_{v \neq 0} \frac{\| (X^{(i)})^\top \nabla_s^2 \phi(X^{(i)}w, y^{(i)}) X^{(i)} v \|_2}{\|v\|_2} \\ & \leq \sup_{v \neq 0} \frac{\| (X^{(i)})^\top \|_{1 \rightarrow 2} \| \nabla_s^2 \phi(X^{(i)}w, y^{(i)}) X^{(i)} v \|_1}{\|v\|_2} \leq \sup_{v \neq 0} \frac{\| (X^{(i)})^\top \|_{1 \rightarrow 2} \cdot \| \nabla_s^2 \phi(X^{(i)}w, y^{(i)}) \|_{\infty \rightarrow 1} \cdot \| X^{(i)} v \|_\infty}{\|v\|_2} \\ & \leq \sup_{v \neq 0} \frac{\| (X^{(i)})^\top \|_{1 \rightarrow 2} \cdot \| \nabla_s^2 \phi(X^{(i)}w, y^{(i)}) \|_{\infty \rightarrow 1} \cdot \| X^{(i)} \|_{2 \rightarrow \infty} \cdot \|v\|_2}{\|v\|_2} \\ & \leq \left( \max_{j=1}^m \|X_j^{(i)}\| \right)^2 \cdot \| \nabla_s^2 \phi(X^{(i)}w, y^{(i)}) \|_{\infty \rightarrow 1} \\ & \leq R_X^2 \| \nabla_s^2 \phi(X^{(i)}w, y^{(i)}) \|_{\infty \rightarrow 1}. \end{aligned}$$

## J. Proof of Lemma 14

*Proof.* Consider the function

$$f(t) = \phi((1-t)s_1 + ts_2).$$

It is clearly non-negative. Moreover

$$\begin{aligned} |f'(t_1) - f'(t_2)| &= | \langle \nabla_s \phi(s_1 + t_1(s_2 - s_1)) - \nabla_s \phi(s_1 + t_2(s_2 - s_1)), s_2 - s_1 \rangle | \\ &\leq \| \nabla_s \phi(s_1 + t_1(s_2 - s_1)) - \nabla_s \phi(s_1 + t_2(s_2 - s_1)) \|_* \cdot \|s_2 - s_1\| \\ &\leq H_\phi |t_1 - t_2| \|s_2 - s_1\|^2 \end{aligned}$$

and therefore it is smooth with constant  $h = H_\phi \|s_2 - s_1\|^2$ . Appealing to Lemma 13 now gives

$$(f(1) - f(0))^2 \leq 6H_\phi \|s_2 - s_1\|^2 (f(1) + f(0))(1-0)^2$$

which proves the lemma since  $f(0) = \phi(s_1)$  and  $f(1) = \phi(s_2)$ .  $\square$

## K. Proof of Proposition 15

*Proof.* Let  $w, w' \in \mathcal{F}_{\phi,2}(r)$ . Using Lemma 14

$$\begin{aligned}
 & \sum_{i=1}^n \frac{1}{n} \left( \phi(X^{(i)}w, y^{(i)}) - \phi(X^{(i)}w', y^{(i)}) \right)^2 \\
 & \leq 6H_\phi \sum_{i=1}^n \frac{1}{n} \left( \phi(X^{(i)}w, y^{(i)}) + \phi(X^{(i)}w', y^{(i)}) \right) \\
 & \quad \cdot \|X^{(i)}w - X^{(i)}w'\|_\infty^2 \\
 & \leq 6H_\phi \cdot \max_{i=1}^n \|X^{(i)}w - X^{(i)}w'\|_\infty^2 \\
 & \quad \cdot \sum_{i=1}^n \frac{1}{n} \left( \phi(X^{(i)}w, y^{(i)}) + \phi(X^{(i)}w', y^{(i)}) \right) \\
 & = 6H_\phi \cdot \max_{i=1}^n \|X^{(i)}w - X^{(i)}w'\|_\infty^2 \cdot \left( \hat{L}_\phi(w) + \hat{L}_\phi(w') \right) \\
 & \leq 12H_\phi r \cdot \max_{i=1}^n \|X^{(i)}w - X^{(i)}w'\|_\infty^2.
 \end{aligned}$$

where the last inequality follows because  $\hat{L}_\phi(w) + \hat{L}_\phi(w') \leq 2r$ .

This immediately implies that if we have a cover of the class  $\mathcal{G}_2$  at scale  $\epsilon/\sqrt{12H_\phi r}$  w.r.t. the metric

$$\max_{i=1}^n \max_{j=1}^m \left| \langle X_j^{(i)}, w \rangle - \langle X_j^{(i)}, w' \rangle \right|$$

then it is also a cover of  $\mathcal{F}_{\phi,2}(r)$  w.r.t.  $d_2^{Z^{(1:n)}}$ . Therefore, we have

$$\mathcal{N}_2(\epsilon, \mathcal{F}_{\phi,2}(r), Z^{(1:n)}) \leq \mathcal{N}_\infty(\epsilon/\sqrt{12H_\phi r}, \mathcal{G}_2, mn). \quad (12)$$

Appealing once again to a result by Zhang (2002, Corollary 3), we get

$$\begin{aligned}
 \log_2 \mathcal{N}_\infty(\epsilon/\sqrt{12H_\phi r}, \mathcal{G}_2, mn) & \leq \left\lceil \frac{12H_\phi W_2^2 R_X^2 r}{\epsilon^2} \right\rceil \\
 & \quad \times \log_2(2mn + 1)
 \end{aligned}$$

which finishes the proof.  $\square$

## L. Proof of Corollary 16

*Proof.* We plug in Proposition 15's estimate into (5):

$$\begin{aligned}
 \widehat{\mathfrak{R}}_n(\mathcal{F}_{\phi,2}(r)) & \leq \inf_{\alpha > 0} \left( 4\alpha + 10 \int_\alpha^{\sqrt{Br}} \sqrt{\frac{\left\lceil \frac{12H_\phi W_2^2 R_X^2 r}{\epsilon^2} \right\rceil \log_2(2mn + 1)}{n}} d\epsilon \right) \\
 & \leq \inf_{\alpha > 0} \left( 4\alpha + 20\sqrt{3}W_2R_X \sqrt{\frac{rH_\phi \log_2(3mn)}{n}} \int_\alpha^{\sqrt{Br}} \frac{1}{\epsilon} d\epsilon \right).
 \end{aligned}$$

Now choosing  $\alpha = C\sqrt{r}$  where  $C = 5\sqrt{3}W_2R_X \sqrt{\frac{H_\phi \log_2(3mn)}{n}}$  gives us the upper bound

$$\widehat{\mathfrak{R}}_n(\mathcal{F}_{\phi,2}(r)) \leq 4\sqrt{r}C \left( 1 + \log \frac{\sqrt{B}}{C} \right) \leq 4\sqrt{r}C \log \frac{3\sqrt{B}}{C}.$$

$\square$

## M. Proof of Theorem 17

*Proof.* We appeal to Theorem 6.1 of [Bousquet \(2002\)](#) that assumes there exists an upper bound

$$\hat{\mathfrak{R}}_n(\mathcal{F}_{2,\phi}(r)) \leq \psi_n(r)$$

where  $\psi_n : [0, \infty) \rightarrow \mathbb{R}_+$  is a non-negative, non-decreasing, non-zero function such that  $\psi_n(r)/\sqrt{r}$  is non-increasing. The upper bound in [Corollary 16](#) above satisfies these conditions and therefore we set  $\psi_n(r) = 4\sqrt{r}C \log \frac{3\sqrt{B}}{C}$  with  $C$  as defined in [Corollary 16](#). From [Bousquet's](#) result, we know that, with probability at least  $1 - \delta$ ,

$$\begin{aligned} \forall w \in \mathcal{F}_2, L_\phi(w) &\leq \hat{L}_\phi(w) + 45r_n^* + \sqrt{8r_n^*L_\phi(w)} \\ &\quad + \sqrt{4r_0L_\phi(w)} + 20r_0 \end{aligned}$$

where  $r_0 = B(\log(1/\delta) + \log \log n)/n$  and  $r_n^*$  is the largest solution to the equation  $r = \psi_n(r)$ . In our case,  $r_n^* = \left(4C \log \frac{3\sqrt{B}}{C}\right)^2$ . This proves the first inequality.

Now, using the above inequality with  $w = \hat{w}$ , the empirical risk minimizer and noting that  $\hat{L}_\phi(\hat{w}) \leq \hat{L}_\phi(w^*)$ , we get

$$\begin{aligned} L_\phi(\hat{w}) &\leq \hat{L}_\phi(w^*) + 45r_n^* + \sqrt{8r_n^*L_\phi(\hat{w})} \\ &\quad + \sqrt{4r_0L_\phi(\hat{w})} + 20r_0 \end{aligned}$$

The second inequality now follows after some elementary calculations detailed below. □

### M.1. Details of some calculations in the proof of Theorem 17

Using [Bernstein's](#) inequality, we have, with probability at least  $1 - \delta$ ,

$$\begin{aligned} \hat{L}_\phi(w^*) &\leq L_\phi(w^*) + \sqrt{\frac{4\text{Var}[\phi(Xw^*, y)] \log(1/\delta)}{n}} + \frac{4B \log(1/\delta)}{n} \\ &\leq L_\phi(w^*) + \sqrt{\frac{4BL_\phi(w^*) \log(1/\delta)}{n}} + \frac{4B \log(1/\delta)}{n} \\ &\leq L_\phi(w^*) + \sqrt{4r_0L_\phi(w^*)} + 4r_0. \end{aligned}$$

Set  $D_0 = 45r_n^* + 20r_0$ . Putting the two bounds together and using some simple upper bounds, we have, with probability at least  $1 - 2\delta$ ,

$$\begin{aligned} L_\phi(\hat{w}) &\leq \sqrt{D_0 \hat{L}_\phi(w^*)} + D_0, \\ \hat{L}_\phi(w^*) &\leq \sqrt{D_0 L_\phi(w^*)} + D_0. \end{aligned}$$

which implies that

$$L_\phi(\hat{w}) \leq \sqrt{D_0} \sqrt{\sqrt{D_0 L_\phi(w^*)} + D_0} + D_0.$$

Using  $\sqrt{ab} \leq (a + b)/2$  to simplify the first term on the right gives us

$$L_\phi(\hat{w}) \leq \frac{D_0}{2} + \frac{\sqrt{D_0 L_\phi(w^*)} + D_0}{2} + D_0 = \frac{\sqrt{D_0 L_\phi(w^*)}}{2} + 2D_0.$$
